# Supplementary material for: Prehospital Stroke Care, Paramedic Training Needs, and Hospital-Directed Feedback in Lithuania
Source: Preprints.org preprint supplement (doi:10.20944/preprints202206.0175.v1), 2022-06-13
Supplement: Supplementary file 1 [file supplementary]

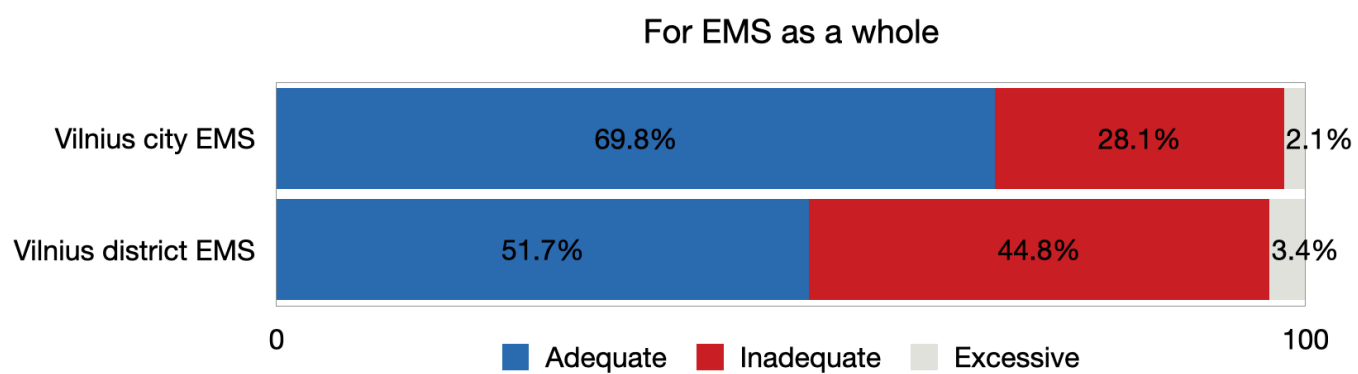

**Figure S1.** Self-reported prehospital stroke care knowledge for EMS in Vilnius city and districts.

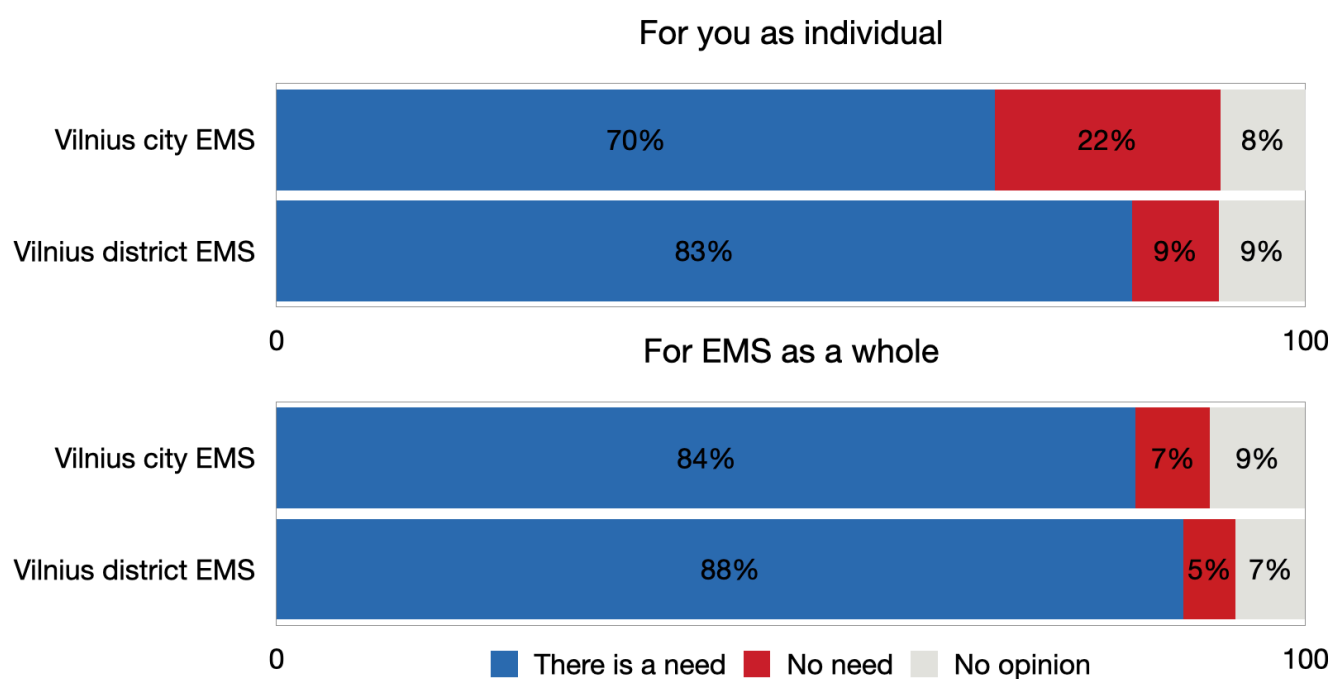

**Figure S2.** Self-reported need for continuous professional development for EMS in Vilnius city and districts.

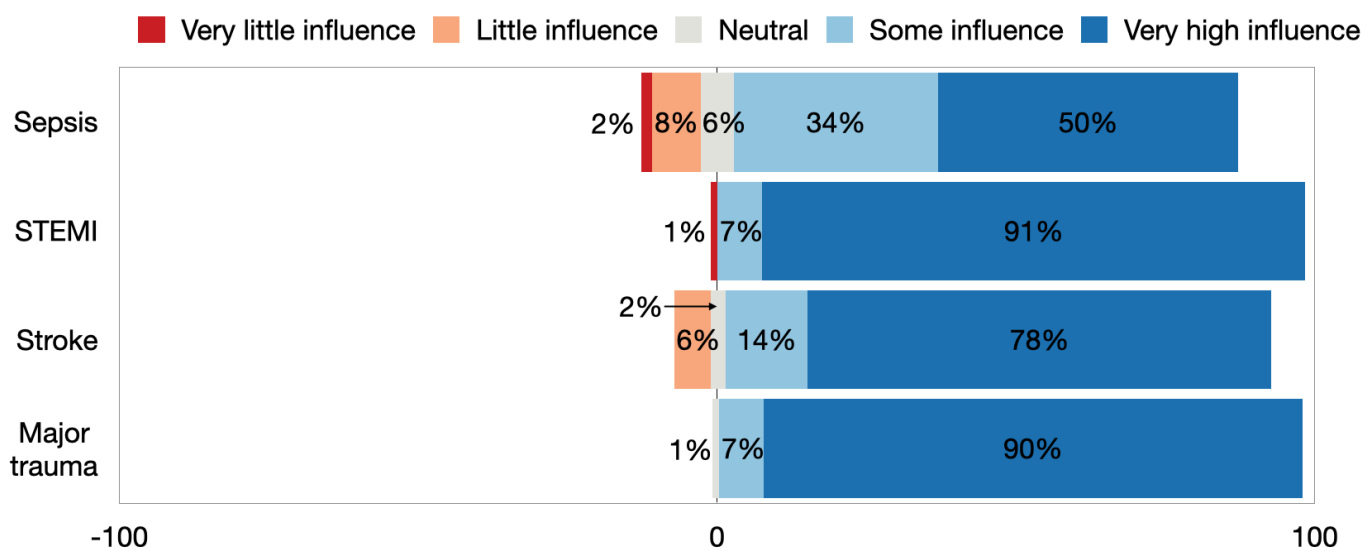

**Figure S3.** Respondents were asked to what extent they thought that pre-hospital actions influence patient outcome.

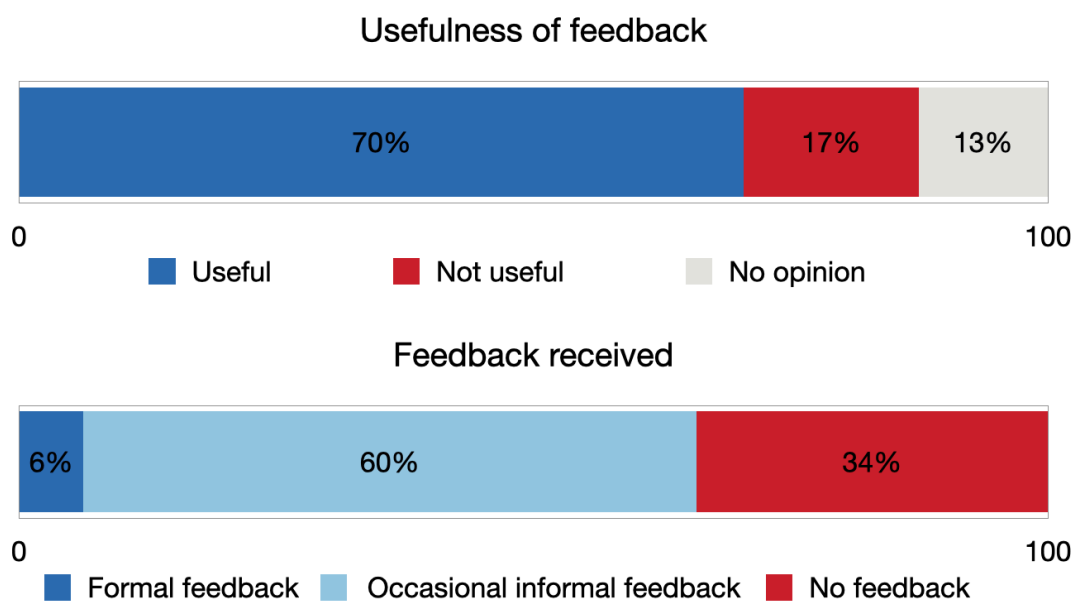

**Figure S4.** Feedback on stroke patients.

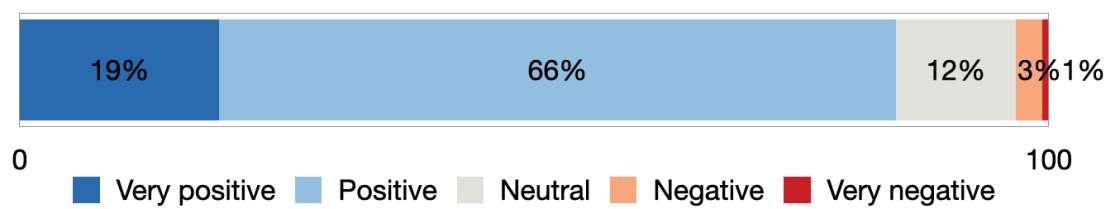

**Figure S5.** Attitude on current Lithuanian stroke care system.
